# Supplementary material for: LiYF4:Yb3+, Er3+upconverting submicro-particles: synthesis and formation mechanism exploration
Source: Royal Society of Chemistry journal article supplement (doi:10.1039/c4ra04756g), 2014-08-13
Supplement: c4ra04756g1.pdf [file c4ra04756g1.pdf]

## Supporting Information

### LiYF<sub>4</sub>:Yb<sup>3+</sup>, Er<sup>3+</sup> Upconverting Submicro-Particles: Synthesis and Formation Mechanism Exploration

Xiangyu Zhang,<sup>a</sup> Minqiang Wang,<sup>\*a</sup> Jijun Ding,<sup>a</sup> Xiaohui Song,<sup>a</sup> Jing Liu,<sup>a</sup> Jinyou Shao,<sup>b</sup> and Yajing Li<sup>a</sup>

<sup>a</sup> Electronic Materials Research Laboratory (EMRL), Key Laboratory of Education Ministry; International Center for Dielectric Research Xi'an Jiaotong University  
Xi'an 710049, China

<sup>b</sup> State Key Laboratory of Manufacturing Systems Engineering, Xi'an Jiaotong University, Xi'an 710049, China

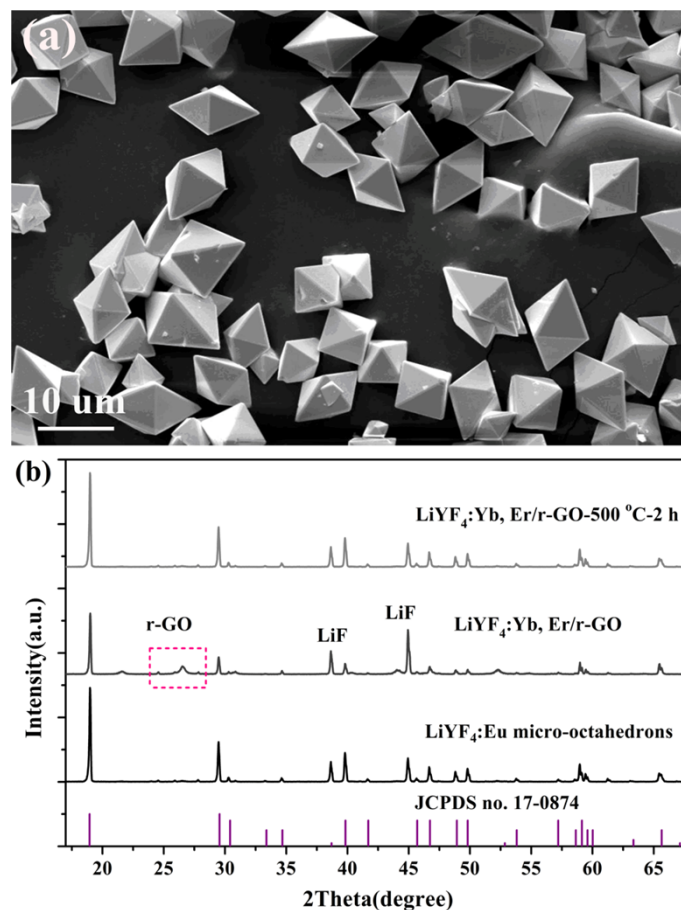

**Figure S1.** (a) SEM images of LiYF<sub>4</sub>: 20 mol% Yb, 2 mol% Er micro-octahedrons and (b) XRD patterns of LiYF<sub>4</sub> micro-octahedrons and r-GO/LiYF<sub>4</sub> submicro-crystals obtained before and after annealing for 2 h at 500 °C. The standard peaks in the pure tetragonal LiYF<sub>4</sub> (JCPDS file number 17-0874) are used as a reference.

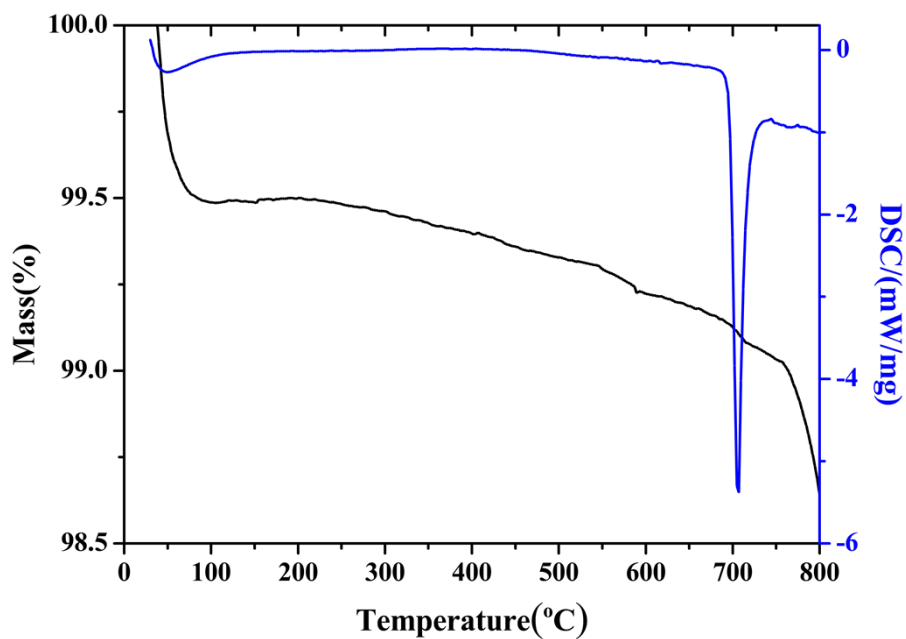

**Figure S2.** TG-DSC curves of  $\text{LiYF}_4:\text{Yb}^{3+}$ ,  $\text{Er}^{3+}/\text{r-GO}$  submicro-composites.

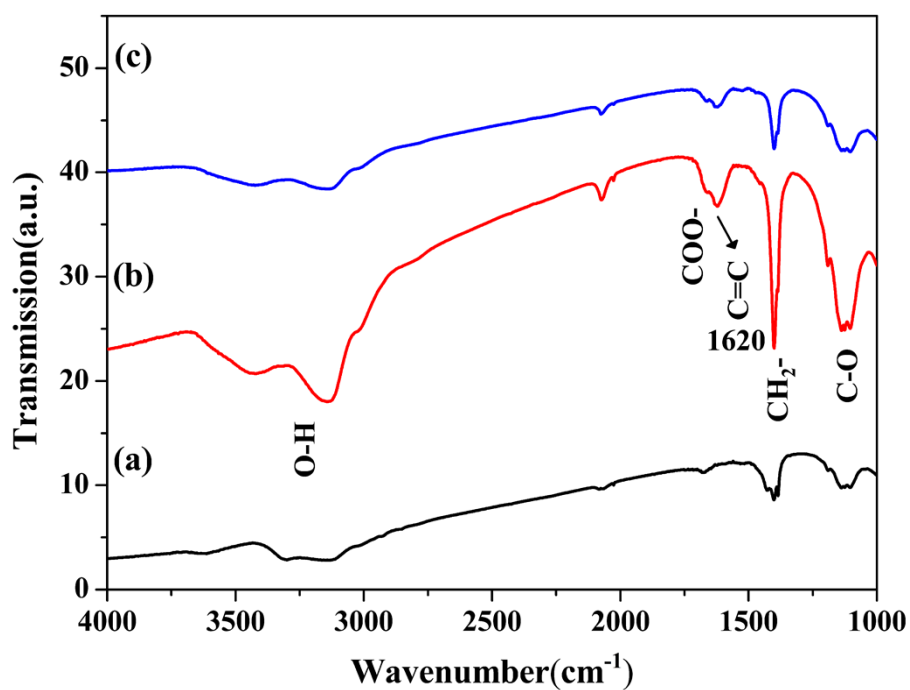

**Figure S3.** FTIR spectra of tetragonal  $\text{LiYF}_4:20$  mol% Yb, 2 mol% Er micro-octahedrons (a) and  $\text{r-GO}/\text{LiYF}_4$  submicro-crystals with (c) and without (b) annealing at  $500\text{ }^\circ\text{C}$  for 2 h.

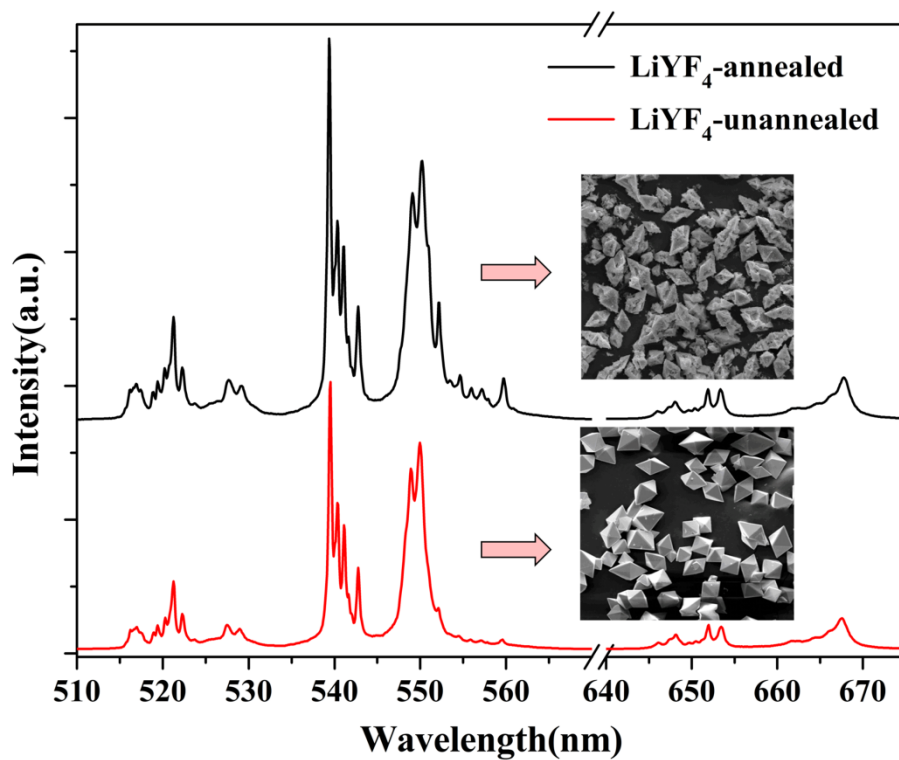

**Figure S4.** Upconverting emission spectra of LiYF<sub>4</sub>: 20 mol% Yb, 2 mol% Er micro-octahedrons with and without sintering at 500 °C for 2 h. The wavelength of excitation is 977 nm.
